# Supplementary material
Source: PubMed Central journal article supplement (PMC1347498)
Supplement: nar_34_suppl-1_D712__1.pdf [file nar_34_suppl-1_D712__1.pdf]

## Entity Relationship Model for DRASTIC-INSIGHTS

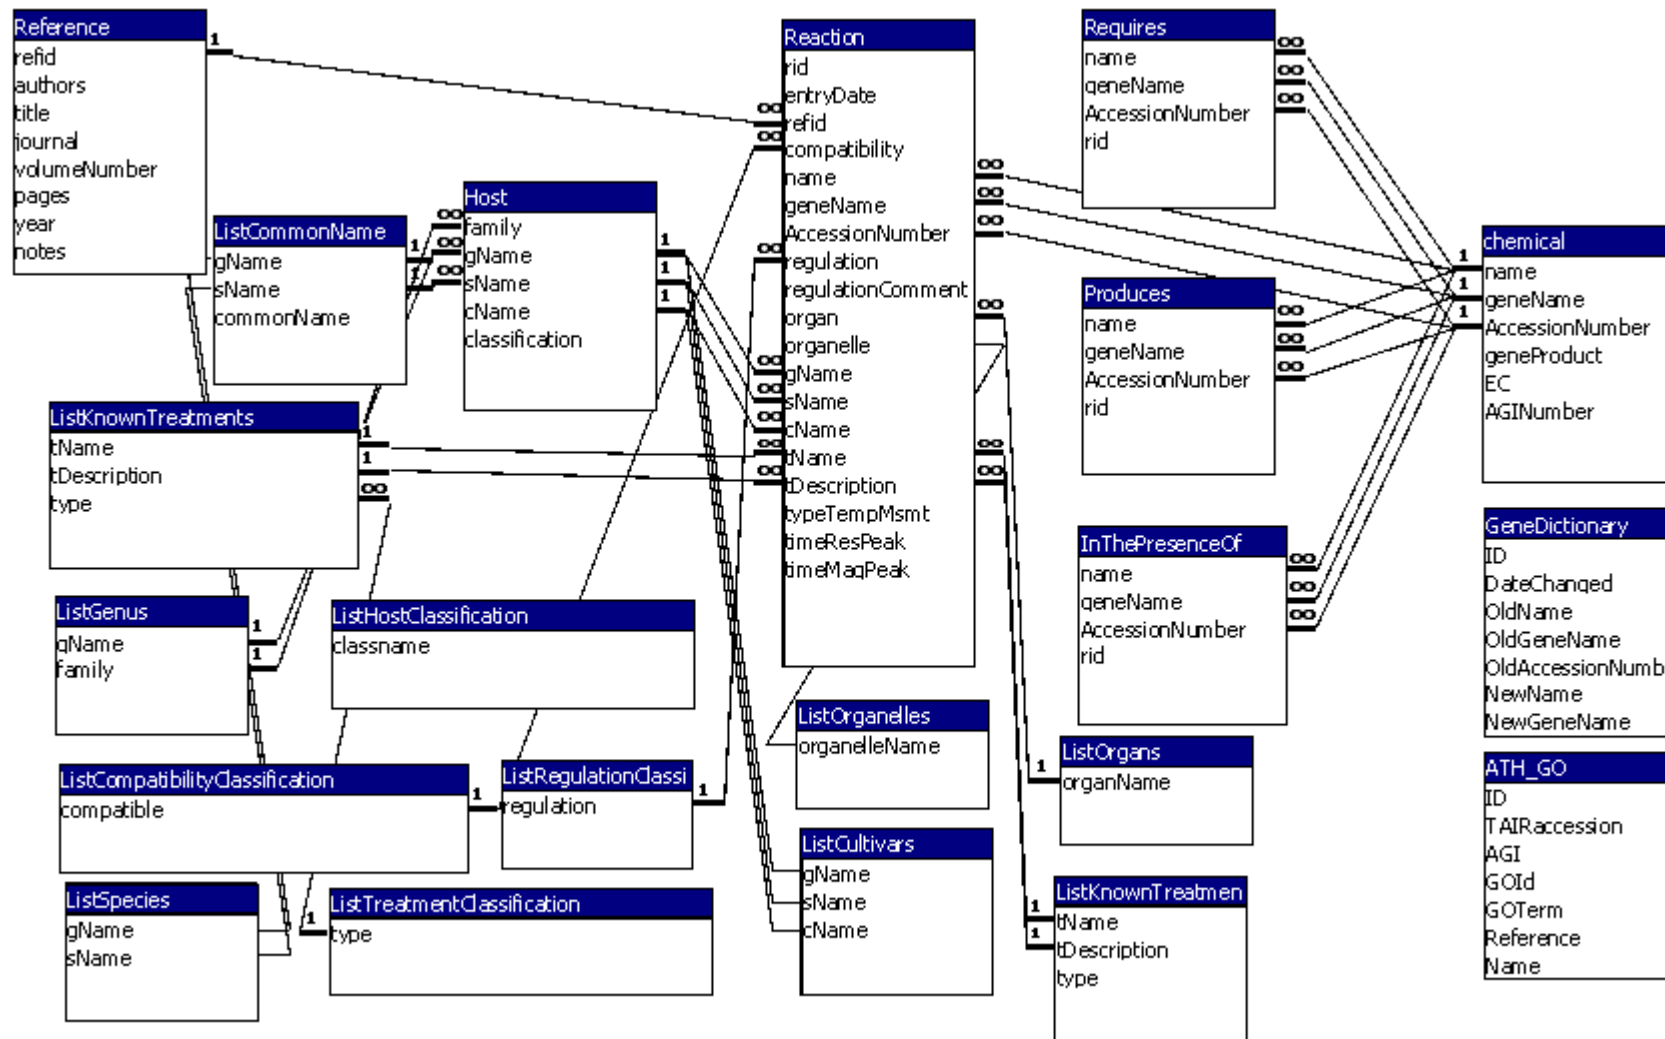

## Explanatory Table Names

| <b>Table</b>                    | <b>Description</b>                                                                                            |
|---------------------------------|---------------------------------------------------------------------------------------------------------------|
| ATH_GO                          | Contains the Gene Ontology (GO) terms for all the Arabidopsis Gene Index (AGI) numbers                        |
| Chemical                        | Details of all genes in the database                                                                          |
| GeneDictionary                  | All updates made to the name, geneName or AccessionNumber attributes are stored                               |
| Host                            | Contains all the plant details including genus, species and cultivar                                          |
| InThePresenceOf                 | InThePresenceOf, Produces and Requires contain chemicals which model a protein-protein reaction               |
| ListCommonName                  | Taxonomic records of the common name for each host                                                            |
| ListCompatibilityClassification | List table that stores all the compatibility classifications                                                  |
| ListCultivars                   | Taxonomic records of all the host cultivars                                                                   |
| ListGenus                       | Taxonomic records of all the host genera                                                                      |
| ListHostClassification          | Taxonomic classification of the host e.g. plant-dicot                                                         |
| ListKnownTreatments             | List table of all treatments                                                                                  |
| ListOrganelles                  | List table of all organelles                                                                                  |
| ListOrgans                      | List table of all organs                                                                                      |
| ListRegulationClassification    | List table of all regulation classifications                                                                  |
| ListSpecies                     | Taxonomic records of all the host species                                                                     |
| ListTreatmentClassification     | List table of treatment classification                                                                        |
| Produces                        | InThePresenceOf, Produces and Requires contain chemicals which model a protein-protein reaction               |
| Reaction                        | This contains all the gene expression records. Each record is comprised of expression data for a single gene. |
| Reference                       | This table contains the full details of each refereed paper that has been used to populate the database.      |
| Requires                        | InThePresenceOf, Produces and Requires contain chemicals which model a protein-protein reaction               |

## Explanatory Attribute Names <sup>1</sup>

| Attribute       | Description                                                                                                                                          | Example                 |
|-----------------|------------------------------------------------------------------------------------------------------------------------------------------------------|-------------------------|
| AccessionNumber | Contains the gene sequence entry number in EMBL format (where available).                                                                            | AY271618                |
| AGINumber       | Arabidopsis Gene Index (AGI) number (only applicable to <i>Arabidopsis thaliana</i> ).                                                               | At5g03650               |
| compatibility   | Certain treatment x host combinations can be classified as compatible or incompatible. This is true for all cases where the treatment is a pathogen. | compatible              |
| classification  | Defines the taxonomic classification of the host.                                                                                                    | Plant-dicot             |
| cName           | Cultivar Name                                                                                                                                        | cv Columbia             |
| EC              | Enzyme nomenclature                                                                                                                                  | 2.4.1.18                |
| family          | Defines the taxonomic family of the host.                                                                                                            | Brassicaceae            |
| geneProduct     | States whether a chemical is a gene product                                                                                                          | Yes/No                  |
| gName           | Genus Name                                                                                                                                           | Arabidopsis             |
| geneName        | Published or preferred symbolic name of a gene                                                                                                       | ALDH7B4                 |
| name            | A description of the gene function                                                                                                                   | aldehyde dehydrogenase  |
| refid           | The identity number of the reference where the gene expression record is cited                                                                       | Auto Number             |
| regulation      | In the case of a gene being expressed this attribute indicates whether it is up or down regulated.                                                   | Up                      |
| rid             | The unique identity number of the record                                                                                                             | Auto Number             |
| sName           | Species Name                                                                                                                                         | thaliana                |
| tDescription    | Treatment Description                                                                                                                                | isolate O-264           |
| tName           | Treatment Name                                                                                                                                       | Alternaria brassicicola |
| timeMagPeak     | Provides a summary of the scale of response                                                                                                          | 4 Fold                  |
| timeResPeak     | Provides a summary of the timing of response                                                                                                         | 3 Hours                 |
| type            | Treatment Type                                                                                                                                       | Abiotic                 |
| typeTempMsmt    | If temporal data is available then this indicates what type of data available                                                                        |                         |

<sup>1</sup>: The above table does not include attributes such as Year or Author as these are self-explanatory.
